# Supplementary material for: Observational, prospective, multicentre study to evaluate the effects of counselling on the choice of combined hormonal contraceptives in Italy—the ECOS (Educational COunselling effectS) study
Source: BMC Womens Health. 2015 Sep 2;15:69. doi: 10.1186/s12905-015-0226-x (PMC4557636; doi:10.1186/s12905-015-0226-x)
Supplement: Additional file 3: — Leaflet. The file provides the counselling leaflet distributed to the subjects. (PDF 2810 kb) [file 12905_2015_226_MOESM3_ESM.pdf]

## Combination Contraceptive Methods

All of these methods contain a fixed combination of estrogen and progesterone. The main differences lie in the frequency of use and the route of administration, which may represent important differences in terms of convenience.

| Method                                                                                                                                                                                                                                                                                                                                                                                                                                                                                                                           | Daily Pill                                                                                                                                                                                                                                                                                                                                                                                                                                                                                                                               | Weekly Transdermal Patch                                                                                                                                                                                                                                                                                                                                                                                                                                                                                                                                                                                                       | Monthly Ring                                                                                                                                                                                                                                                                                                                                                                                                                                                                                                                                                                                                |
|----------------------------------------------------------------------------------------------------------------------------------------------------------------------------------------------------------------------------------------------------------------------------------------------------------------------------------------------------------------------------------------------------------------------------------------------------------------------------------------------------------------------------------|------------------------------------------------------------------------------------------------------------------------------------------------------------------------------------------------------------------------------------------------------------------------------------------------------------------------------------------------------------------------------------------------------------------------------------------------------------------------------------------------------------------------------------------|--------------------------------------------------------------------------------------------------------------------------------------------------------------------------------------------------------------------------------------------------------------------------------------------------------------------------------------------------------------------------------------------------------------------------------------------------------------------------------------------------------------------------------------------------------------------------------------------------------------------------------|-------------------------------------------------------------------------------------------------------------------------------------------------------------------------------------------------------------------------------------------------------------------------------------------------------------------------------------------------------------------------------------------------------------------------------------------------------------------------------------------------------------------------------------------------------------------------------------------------------------|
|                                                                                                                                                                                                                                                                                                                                                                                                                                                                                                                                  | 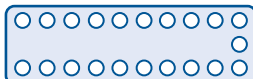                                                                                                                                                                                                                                                                                                                                                                                                                                                       | 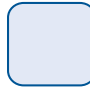                                                                                                                                                                                                                                                                                                                                                                                                                                                                                                                                            | 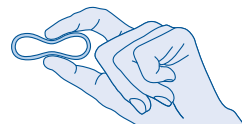                                                                                                                                                                                                                                                                                                                                                                                                                                                                                                                         |
| Description                                                                                                                                                                                                                                                                                                                                                                                                                                                                                                                      | A package of 21 pills with estrogen and progestogen. Each pill is used for one day of contraception.                                                                                                                                                                                                                                                                                                                                                                                                                                     | Three adhesive skin patches with estrogen and progestogen. Each patch is used for one week of contraception.                                                                                                                                                                                                                                                                                                                                                                                                                                                                                                                   | One flexible, vaginal, plastic ring with estrogen and progestogen. The ring is used for one month of contraception.                                                                                                                                                                                                                                                                                                                                                                                                                                                                                         |
| Effectiveness (when used as directed)                                                                                                                                                                                                                                                                                                                                                                                                                                                                                            | 99%                                                                                                                                                                                                                                                                                                                                                                                                                                                                                                                                      | 99%                                                                                                                                                                                                                                                                                                                                                                                                                                                                                                                                                                                                                            | 99%                                                                                                                                                                                                                                                                                                                                                                                                                                                                                                                                                                                                         |
| Return to Fertility                                                                                                                                                                                                                                                                                                                                                                                                                                                                                                              | Fertility usually returns quickly once contraception method is stopped.                                                                                                                                                                                                                                                                                                                                                                                                                                                                  |                                                                                                                                                                                                                                                                                                                                                                                                                                                                                                                                                                                                                                |                                                                                                                                                                                                                                                                                                                                                                                                                                                                                                                                                                                                             |
| Specific Characteristics                                                                                                                                                                                                                                                                                                                                                                                                                                                                                                         | <ul style="list-style-type: none"><li>• Most studied method, with more experience than other methods</li><li>• Regular menstrual bleeding patterns</li><li>• Effectiveness depends on daily administration</li><li>• The pill releases the hormones into the digestive tract<ul style="list-style-type: none"><li>– Efficacy affected by vomiting and diarrhea</li></ul></li><li>• Daily fluctuation in hormone levels</li><li>• Can be used to delay menstruation, if desired</li><li>• Some noncontraceptive benefits proven</li></ul> | <ul style="list-style-type: none"><li>• Regular menstrual bleeding patterns</li><li>• No need to remember everyday</li><li>• Greater incidence of breast tenderness</li><li>• Not recommended for women weighing more than 90 Kg</li><li>• Estrogen levels (over 21 days) higher than with pill or ring*</li><li>• Can be used to delay menstruation, if desired</li><li>• The patch releases the hormones across the skin<ul style="list-style-type: none"><li>– Greater incidence of skin irritation and allergic skin reactions</li></ul></li><li>• Noncontraceptive benefits likely to be present but not proven</li></ul> | <ul style="list-style-type: none"><li>• Very regular and predictable menstrual bleeding patterns</li><li>• No need to remember everyday</li><li>• The ring releases the hormones across the vaginal wall<ul style="list-style-type: none"><li>– Greater incidence of vaginal or device-related symptoms</li></ul></li><li>• Minimal awareness of the ring during sexual relations and everyday life</li><li>• Continuous low-dose estrogen levels (over 21 days)*</li><li>• Can be used to delay menstruation, if desired</li><li>• Noncontraceptive benefits likely to be present but not proven</li></ul> |
| Mode of Administration                                                                                                                                                                                                                                                                                                                                                                                                                                                                                                           | Oral                                                                                                                                                                                                                                                                                                                                                                                                                                                                                                                                     | Transdermal                                                                                                                                                                                                                                                                                                                                                                                                                                                                                                                                                                                                                    | Vaginal                                                                                                                                                                                                                                                                                                                                                                                                                                                                                                                                                                                                     |
| Use While Breastfeeding                                                                                                                                                                                                                                                                                                                                                                                                                                                                                                          | Should not be used while breastfeeding.                                                                                                                                                                                                                                                                                                                                                                                                                                                                                                  |                                                                                                                                                                                                                                                                                                                                                                                                                                                                                                                                                                                                                                |                                                                                                                                                                                                                                                                                                                                                                                                                                                                                                                                                                                                             |
| STD and HIV protection                                                                                                                                                                                                                                                                                                                                                                                                                                                                                                           | Does not protect against sexually transmitted diseases and HIV.                                                                                                                                                                                                                                                                                                                                                                                                                                                                          |                                                                                                                                                                                                                                                                                                                                                                                                                                                                                                                                                                                                                                |                                                                                                                                                                                                                                                                                                                                                                                                                                                                                                                                                                                                             |
| Possible side effects                                                                                                                                                                                                                                                                                                                                                                                                                                                                                                            | Irregular menstrual bleeding, headache, vomiting, diarrhea, abdominal pain, weight increase (fluid retention), depressed mood, mood altered, breast pain                                                                                                                                                                                                                                                                                                                                                                                 |                                                                                                                                                                                                                                                                                                                                                                                                                                                                                                                                                                                                                                |                                                                                                                                                                                                                                                                                                                                                                                                                                                                                                                                                                                                             |
| <p>For some women, progestogen-only methods (minipill, injection, implant, or intrauterine system) may be a good alternative. These methods are highly effective and can be used while breastfeeding. The main side effect is unpredictable menstrual bleeding.</p> <p>*Amount of estrogen exposure (ethinyl estradiol: EE) in the blood over 21 days. The clinical significance of these findings, if any, is unknown.</p> <p>Developed in consultation with the European Society of Contraception and Reproductive Health.</p> |                                                                                                                                                                                                                                                                                                                                                                                                                                                                                                                                          |                                                                                                                                                                                                                                                                                                                                                                                                                                                                                                                                                                                                                                |                                                                                                                                                                                                                                                                                                                                                                                                                                                                                                                                                                                                             |
| <div>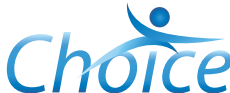<p>Contraceptive Health Research<br/>Of Informed Choice Experience</p></div>                                                                                                                                                                                                                                                                                                                                                           |                                                                                                                                                                                                                                                                                                                                                                                                                                                                                                                                          |                                                                                                                                                                                                                                                                                                                                                                                                                                                                                                                                                                                                                                |                                                                                                                                                                                                                                                                                                                                                                                                                                                                                                                                                                                                             |
